# Supplementary material for: Discovering the Biological Significance and Therapeutic Potential of miR-29b-3p in Triple-Negative Breast Cancer
Source: MDPI journal article supplement (doi:10.3390/ijms24055048), 2023-03-06
Supplement: s1 [file s1]

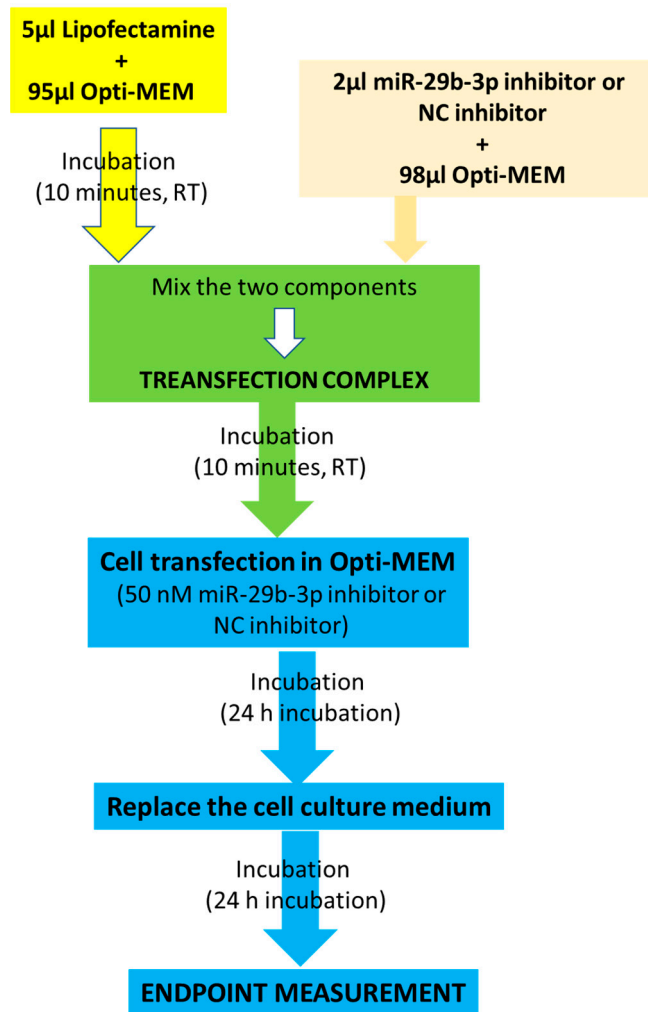

**Figure S1.** Experimental workflow for transfection procedure. TNBC cell lines were transfected with miR-29b-3p and negative control (NC) inhibitor at a final concentration of 50 nM and collected 48 hours post transfection. .



**Table S1.** Mutational pattern for untreated BT549 and MDA-MB-231 cell lines (the NGS data were align to hg19)

| Sample     | Locus           | Genes  | Allele<br>Frequency % | Coding      | Amino Acid Change  | ClinVar                      |
|------------|-----------------|--------|-----------------------|-------------|--------------------|------------------------------|
| MDA-MB-231 | chr3:178917005  | PIK3CA | 33.38                 | c.352+40A>G |                    | VUS                          |
|            | chr4:55980239   | KDR    | 30.88                 | c.798+54G>A |                    | VUS                          |
|            | chr7:140481417  | BRAF   | 55.55                 | c.1391G>T   | p.Gly464Val        | Pathogenic/Likely pathogenic |
|            | chr12:25398280  | KRAS   | 60.52                 | c.38G>A     | p.Gly13Asp         | Pathogenic                   |
|            | chr17:7577094   | TP53   | 99.3                  | c.839G>A    | p.Arg280Lys        | Pathogenic/Likely pathogenic |
|            | chr17:7579472   | TP53   | 96.63                 | c.215C>G    | p.Pro72Arg         | Benign                       |
|            | chr18:48586344  | SMAD4  | 56.27                 | c.955+58C>T |                    | VUS                          |
| BT549      | chr2:212812097  | ERBB4  | 100                   | c.421+58A>G |                    | VUS                          |
|            | chr5:149433595  | CSF1R  | 32.28                 | c.*37AC>C   |                    | VUS                          |
|            | chr5:149433597  | CSF1R  | 32.22                 | c.*35C>TC   |                    | VUS                          |
|            | chr11:108236264 | ATM    | 32.67                 | c.*29C>G    |                    | Likely benign                |
|            | chr13:28610183  | FLT3   | 100                   | c.1310-3T>C |                    | VUS                          |
|            | chr17:7577528   | TP53   | 99.94                 | c.747G>C    | p.Arg249Ser        | VUS                          |
|            | chr17:7577533   | TP53   | 100                   | c.747delG   | p.Arg249SerfsTer96 | VUS                          |
